# Supplementary material
Source: HighWire-hosted journal article supplement (https://rc.rcjournal.com/highwire/filestream/21640/field_highwire_adjunct_files/0/AARC_Poster_VAE.pdf)
Supplement: AARC_Poster_VAE.pdf [file AARC_Poster_VAE.pdf]

## BACKGROUND

- In 2016, the CDC announced the pediatric Ventilator Associated Events (VAE) definition that would replace the Ventilator Associated Pneumonia (VAP) events beginning in 2017.
- The internal interdisciplinary VAP committee began work for surveillance and case reviews for this new metric alongside VAP surveillance and sought to estimate the burden of VAE compared to VAP.

## OBJECTIVES

- **Determine the incidence and characteristics of Pediatric VAE at a quaternary children's hospital.**
- **Identify trends and opportunities for reduction or prevention of VAE**

## DEFINITION

Baseline period of stability:  $\geq 2$  calendar days (immediately preceding first day of decompensation) of stable or decreasing daily minimum  $FiO_2$  or  $Paw$  values.

VAE: at least one of the following indicators of worsening oxygenation:

- ❖ Increase in daily minimum\*  $FiO_2$  of  $\geq 0.25$  (25 points) over the daily minimum  $FiO_2$  of the first day in the baseline period, sustained for  $\geq 2$  calendar days.
- ❖ Increase in daily minimum\* MAP values of  $\geq 4$  cmH<sub>2</sub>O over the daily minimum MAP of the first day in the baseline period, sustained for  $\geq 2$  calendar days. The MAP recordings should be reflective of ventilator breaths vs. patient breaths

## METHODS

- A surveillance report was developed through EPIC in accordance with the CDC definitions for qualifying changes in  $Paw$  or  $FiO_2$  for all invasively ventilated patient.
- This query runs at midnight each day and sends the report to the Respiratory Therapy Department Clinical Specialists for review and final determination.
- When a VAE occurs, an interdisciplinary case review occurs.
- Exemption was provided from local IRB.

## RESULTS

- From January 2017 – April 2021, 112 VAE's occurred compared to 17 VAP's over the same time period ( $X^2$   $p=0.220$ ).
- Median age in months at the time of event as 8.85 (IQR 5.15-43.42).
- Forty-two percent occurred in the pediatric ICU, 31% Neonatal ICU, 16% Cardiac ICU, and 11% Progressive Care Unit. Eighty-Four percent were triggered for change in  $Paw$ .
- Events deemed associated with the VAE were categorized.
- Of note, **none of the VAE's had a concurrent VAP and only 6 (5%) of the events were thought to have been preventable by the clinical team.**

| Category of Association               | N (%)   |
|---------------------------------------|---------|
| Severe BPD                            | 33 (29) |
| Progressive Lung Disease              | 13 (12) |
| Infectious                            | 13 (12) |
| ARDS                                  | 10 (9)  |
| Airway Disease                        | 10 (9)  |
| Progressive Complex Cardiac Condition | 9 (8)   |
| Abdominal Disease                     | 8 (7)   |
| Other                                 | 7 (6)   |
| Atelectasis                           | 7 (6)   |
| Reintubation/Planned Extubation       | 5 (4)   |
| Pulmonary Hypertension                | 5 (4)   |
| Pulm Hemorrhage/Edema                 | 5 (4)   |
| ARDS                                  | 5 (4)   |
| Thoracic Surgery                      | 3 (3)   |
| Reintubation/Unplanned Extubation     | 2 (2)   |
| Physiology Change                     | 2 (2)   |
| Abdominal Surgery                     | 2 (2)   |
| Met Brain Death Failure               | 1 (1)   |
| VAP                                   | 0 (0)   |

## CONCLUSIONS

- The occurrence of pediatric VAE in a quaternary children's hospital is six-fold higher than the occurrence of VAP, with 100% discordance between the events.
- The pediatric VAE definition does not appear to trigger events of error or harm as the clinical teams perceived them to be non-preventable or predictable but were part of the anticipated clinical disease progression in our patient population.
